# Supplementary material for: Replacing bar graphs of continuous data with more informative graphics: are we making progress?
Source: PubMed Central journal article supplement (PMC9366861; doi:10.1042/cs20220287), 2022-08-10
Supplement: CS-2022-0287_supp.pdf [file CS-2022-0287_supp.pdf]

**Supplemental tables for:**

**Replacing bar graphs of continuous data with more informative graphics: Are we making progress?**

Nico Riedel, Robert Schulz, Vartan Kazezian, Tracey Weissgerber

**Table S1:** Fields of Research classifications included in the study

| <b>Field</b>                                      | <b>Code</b> |
|---------------------------------------------------|-------------|
| Biological sciences                               | 600         |
| Biochemistry & cell biology                       | 601         |
| Evolutionary biology                              | 603         |
| Genetics                                          | 604         |
| Microbiology                                      | 605         |
| Physiology                                        | 606         |
| Medical biochemistry & metabolomics               | 1101        |
| Cardiorespiratory medicine & Hematology           | 1102        |
| Complementary & alternative medicine              | 1104        |
| Dentistry                                         | 1105        |
| Human movement & sport science                    | 1106        |
| Immunology                                        | 1107        |
| Medical microbiology                              | 1108        |
| Neurosciences                                     | 1109        |
| Nursing                                           | 1110        |
| Nutrition & dietetics                             | 1111        |
| Oncology & carcinogenesis                         | 1112        |
| Ophthalmology & optometry                         | 1113        |
| Pediatrics & reproductive medicine                | 1114        |
| Pharmacology & pharmaceutical sciences            | 1115        |
| Medical physiology                                | 1116        |
| Multidisciplinary journals ( $\geq 4$ categories) | N/A         |
| Uncategorized journals                            | N/A         |

Abbreviations: N/A, not applicable.

**Table S2:** Papers screened by field and year

| Field                                | 2010 | 2011 | 2012 | 2013 | 2014 | 2015 | 2016 | 2017 | 2018 | 2019 | 2020 | Scale |
|--------------------------------------|------|------|------|------|------|------|------|------|------|------|------|-------|
| Biochemistry & Cell Biology          | 993  | 987  | 989  | 966  | 996  | 996  | 994  | 998  | 1000 | 994  | 1000 | 200s  |
| Biological Sciences                  | 999  | 994  | 999  | 992  | 995  | 999  | 996  | 998  | 996  | 992  | 996  | 300s  |
| Cardiorespiratory Med. & Haematology | 891  | 789  | 887  | 875  | 968  | 924  | 997  | 994  | 992  | 989  | 998  | 400s  |
| Complementary & Alternative Med.     | 305  | 499  | 890  | 991  | 989  | 1000 | 1000 | 1000 | 1000 | 1000 | 1000 | 500s  |
| Dentistry                            | 279  | 347  | 642  | 596  | 709  | 789  | 830  | 829  | 851  | 867  | 912  | 600s  |
| Evolutionary Biology                 | 544  | 898  | 944  | 944  | 931  | 947  | 956  | 982  | 980  | 1000 | 1000 | 700s  |
| Genetics                             | 1000 | 1000 | 1000 | 1000 | 1000 | 1000 | 1000 | 992  | 1000 | 1000 | 1000 | 800s  |
| Human Movement & Sports Science      | 403  | 456  | 542  | 749  | 824  | 860  | 990  | 946  | 1000 | 997  | 1000 | 900s  |
| Immunology                           | 873  | 921  | 909  | 997  | 967  | 999  | 999  | 976  | 984  | 999  | 1000 |       |
| Medical Biochemistry & Metabolomics  | 331  | 437  | 441  | 599  | 902  | 733  | 714  | 784  | 870  | 999  | 1000 |       |
| Medical Microbiology                 | 877  | 907  | 904  | 916  | 935  | 934  | 993  | 972  | 1000 | 999  | 1000 |       |
| Medical Physiology                   | 347  | 393  | 647  | 843  | 975  | 996  | 1000 | 1000 | 1000 | 1000 | 1000 |       |
| Microbiology                         | 1000 | 1000 | 1000 | 970  | 967  | 1000 | 1000 | 1000 | 1000 | 998  | 1000 |       |
| Multidisciplinary Journals           | 1000 | 1000 | 1000 | 1000 | 1000 | 1000 | 1000 | 1000 | 1000 | 999  | 1000 |       |
| Neurosciences                        | 959  | 940  | 933  | 959  | 993  | 994  | 998  | 997  | 998  | 999  | 997  |       |
| Nursing                              | 768  | 857  | 941  | 999  | 1000 | 997  | 997  | 996  | 999  | 993  | 1000 |       |
| Nutrition & Dietetics                | 388  | 561  | 711  | 925  | 941  | 964  | 1000 | 1000 | 1000 | 1000 | 1000 |       |
| Oncology & Carcinogenesis            | 996  | 992  | 998  | 998  | 999  | 997  | 1000 | 1000 | 1000 | 998  | 999  |       |
| Ophthalmology & Optometry            | 608  | 698  | 685  | 689  | 815  | 807  | 932  | 899  | 886  | 931  | 988  |       |
| Paediatrics & Reproductive Med.      | 652  | 667  | 818  | 826  | 892  | 914  | 978  | 980  | 987  | 981  | 989  |       |
| Pharmacology & Pharmaceutical Sci.   | 739  | 823  | 836  | 918  | 977  | 959  | 971  | 982  | 997  | 974  | 980  |       |
| Physiology                           | 226  | 297  | 434  | 556  | 712  | 799  | 945  | 996  | 999  | 999  | 1000 |       |
| Unclassified Journals                | 851  | 855  | 919  | 958  | 954  | 937  | 943  | 908  | 871  | 893  | 998  |       |

Values represent the number of papers identified and screened in each field for each year. Light green shades correspond to lower numbers (typically due to a limited number of publications being accessible in PubMed Central for the specified field and year), whereas dark blue shades correspond to higher numbers. Abbreviations: Med., medicine; Sci., science.
